# Supplementary material for: Punctual and kinetic MRD analysis from the Fondazione Italiana Linfomi MCL0208 phase 3 trial in mantle cell lymphoma
Source: PubMed Central journal article supplement — Blood. 2022 Sep 22;140(12):1378–89. doi: 10.1182/blood.2021014270 (PMC9507010; doi:10.1182/blood.2021014270), 2022-09-22
Supplement: bloodBLD2021014270-suppl1.pdf [file bloodBLD2021014270-suppl1.pdf]

# SUPPLEMENTARY

## FIGURES

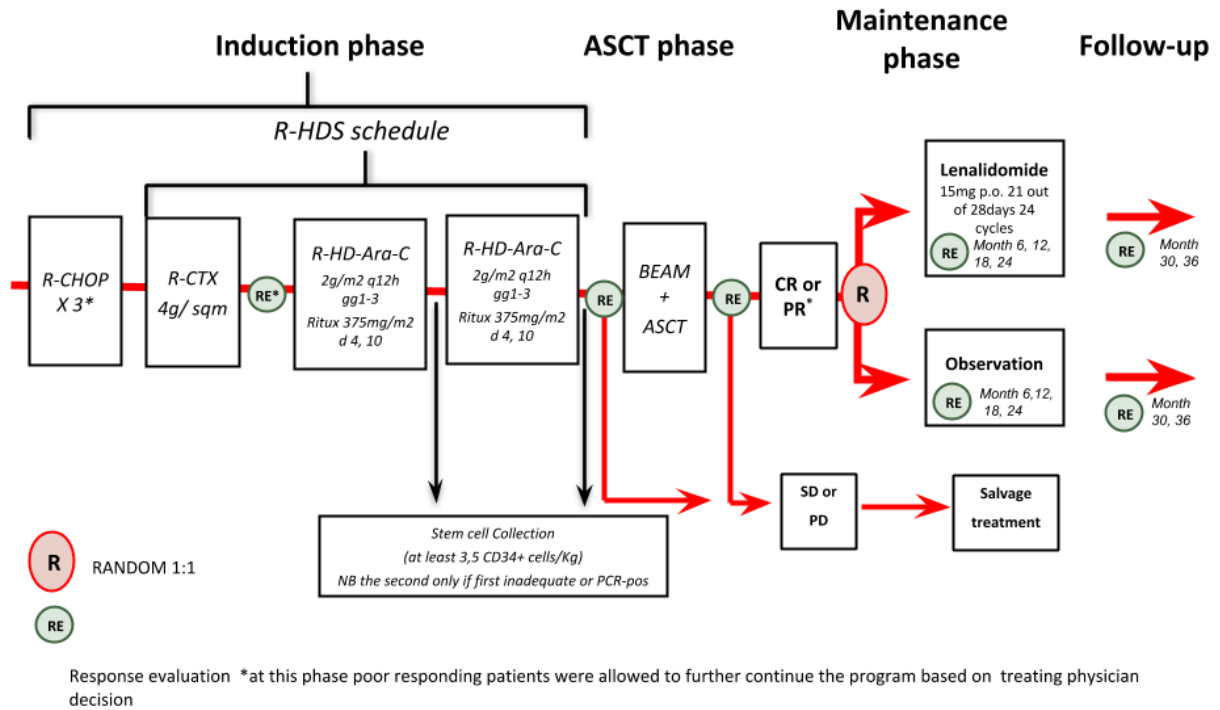

**Figure S1. Clinical trial design.**

**Abbreviations.** R.HDS: Rituximab- high dose schedule. R-CHOP: Rituximab- Cyclophosphamide Doxorubicin Vincristine and Prednisone. R-CTX: Rituximab-Cyclophosphamide. R-HD-ARAC: Rituximab- High Dose- Citarabine. BEAM: Carmustine, Etoposide, Cytarabine, Melphalan. ASCT: Autologous Stem Cell Transplant. CR: Complete remission. PR: Partial Remission. SD: Stable Disease. PD: Progression Disease. RE: Restaging .

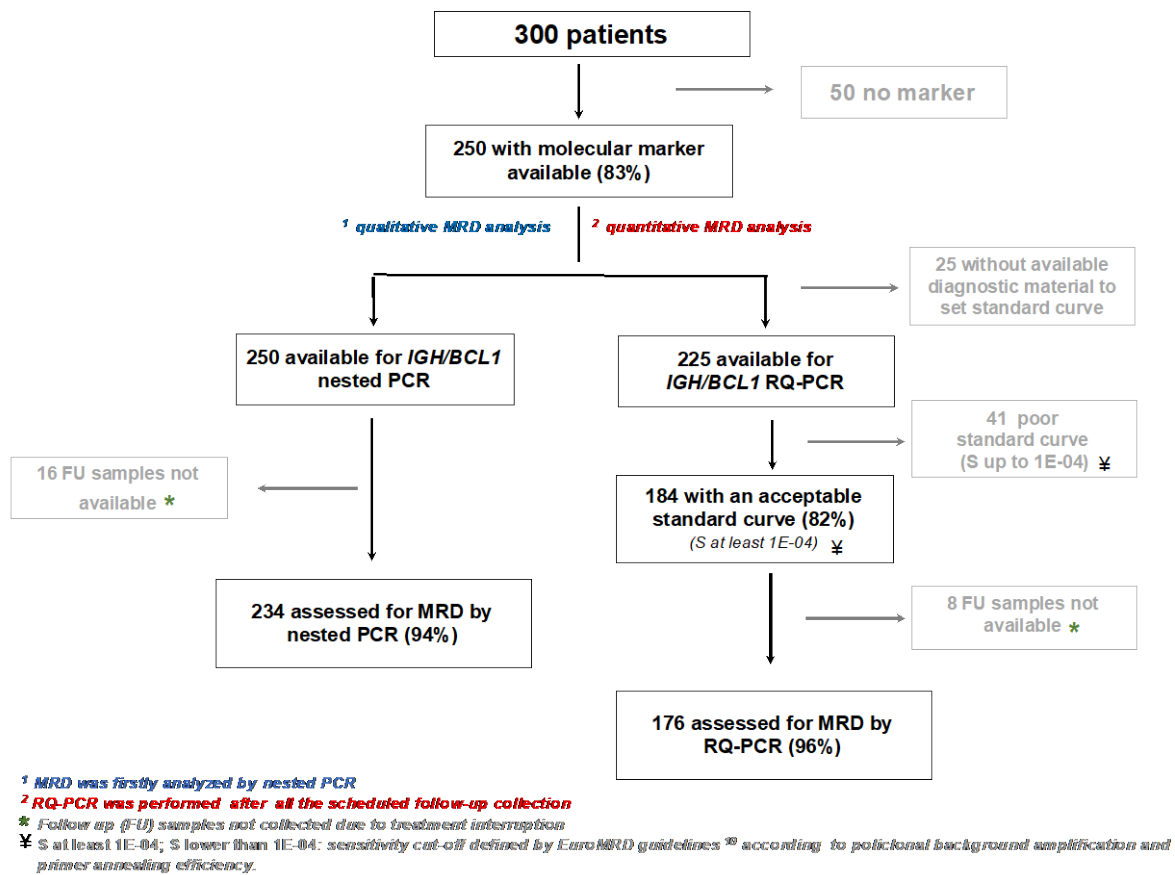

**Figure S2. Samples flow for MRD detection.**

Abbreviations. MRD: Minimal Residual Disease; RQ-PCR: Real Time Quantitative Polymerase Chain Reaction; S: sensitivity; FU: follow up.

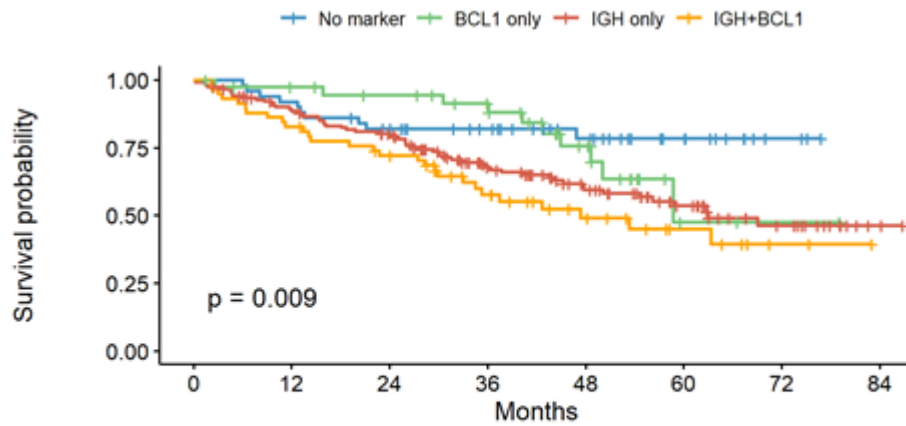

|           | Number at risk |     |     |    |    |    |    |    |
|-----------|----------------|-----|-----|----|----|----|----|----|
|           | 0              | 12  | 24  | 36 | 48 | 60 | 72 | 84 |
| No marker | 50             | 46  | 39  | 32 | 23 | 12 | 3  | 0  |
| BCL1 only | 39             | 35  | 32  | 27 | 15 | 2  | 1  | 0  |
| IGH only  | 153            | 129 | 113 | 73 | 51 | 30 | 15 | 2  |
| IGH+BCL1  | 58             | 48  | 40  | 26 | 15 | 8  | 2  | 0  |

**Figure S3. Impact on TTP of molecular marker detection.**

Abbreviations. TTP, time to progression; No marker: no marker detected at diagnosis; BCL1 only: patients with only *BCL1*/*IGH* marker available; IGH only: patients with only *IGH* marker available; IGH+BCL1: patients with both markers.

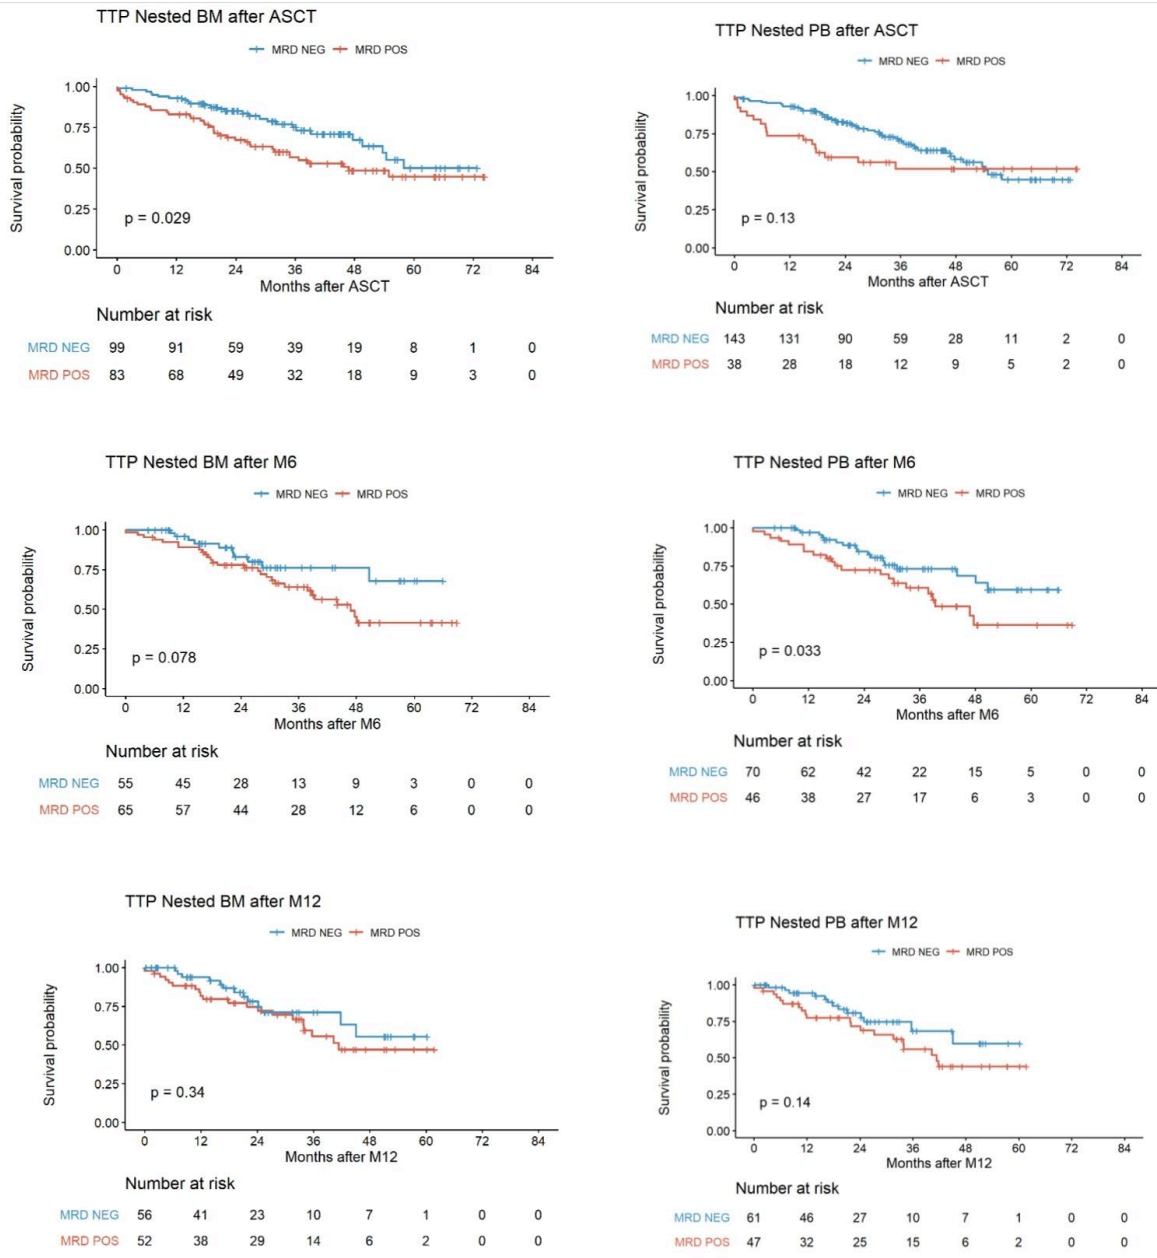

**Figure S4. MRD impact on TTP, measured by nested PCR.** Timepoints after ASCT, M6 and M12 measured in BM (left) and in PB (right). Abbreviations. MRD, minimal residual disease; TTP, time to progression; ASCT, autologous stem cell transplant; M6, six months from transplant; M12, twelve months from transplant; Nested, nested polymerase chain reaction; NEG, negative; POS, positive; BM, bone marrow; PB, peripheral blood.

### TTP MRD ASCT/M6/M12 post M12

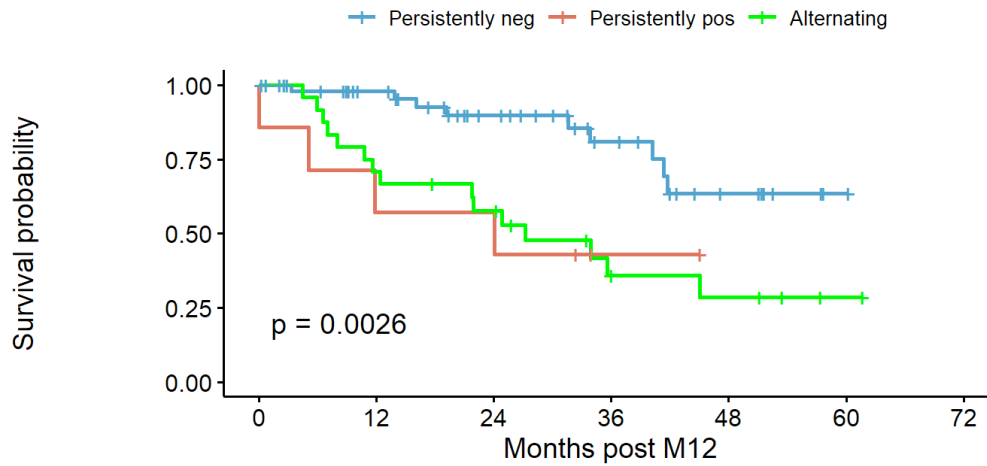

#### Number at risk

|                  |    |    |    |    |   |   |   |
|------------------|----|----|----|----|---|---|---|
| Persistently neg | 52 | 40 | 27 | 16 | 7 | 1 | 0 |
| Persistently pos | 7  | 4  | 4  | 1  | 0 | 0 | 0 |
| Alternating      | 24 | 17 | 13 | 5  | 4 | 1 | 0 |

**Figure S5. Impact of MRD kinetics on TTP.** MRD results by RQ-PCR in BM between ASCT and M12 were considered. Landmark analysis starting from the date of M12 MRD determination.

**Abbreviations.** MRD, minimal residual disease; RQ-PCR, Real Time quantitative polymerase chain reaction; BM, bone marrow; ASCT: Autologous stem cell transplant; M, months after ASCT Neg: negative. Pos: positive. Alternating: at least one positive and one negative time point in the first year post ASCT.

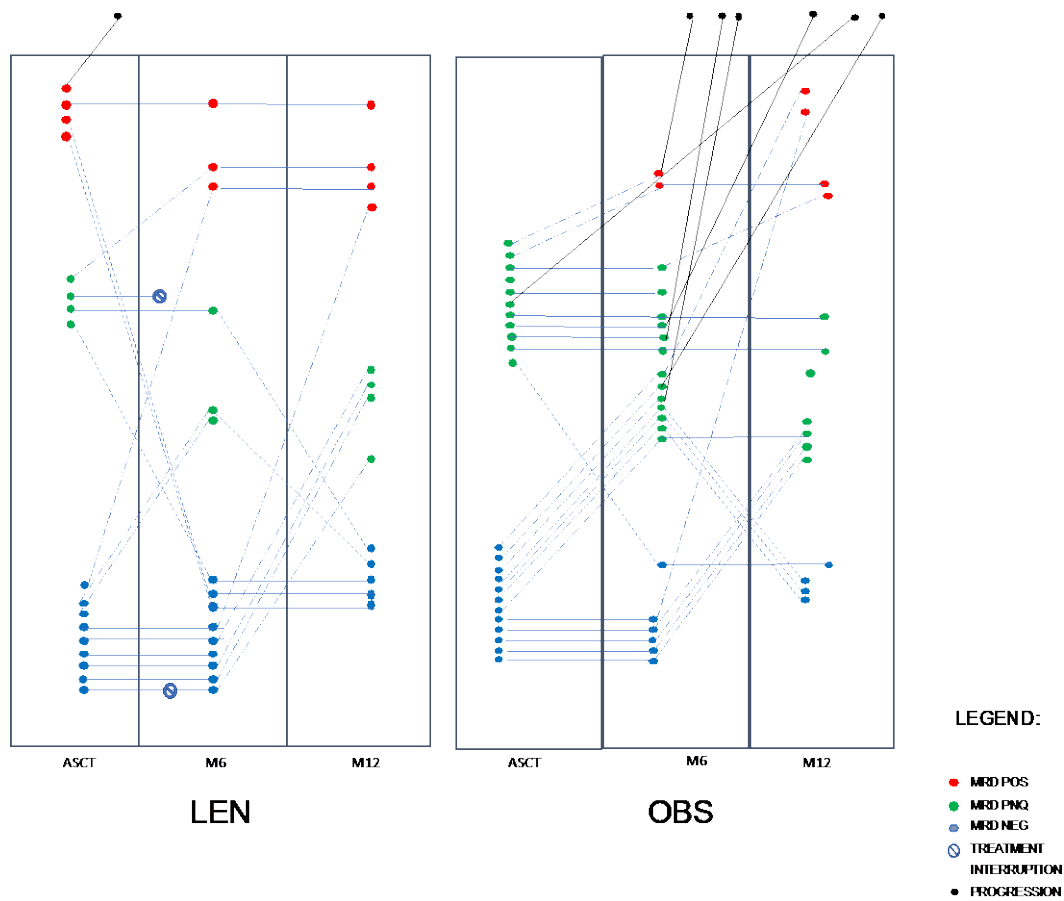

**Figure S6. MRD kinetics in the randomized population during the first year after ASCT.** Only patients with alternating MRD results are represented here in detail. [Abbreviations](#). LEN: Lenalidomide arm. OBS: observation arm. ASCT: Autologous stem cell transplant. M6: six months from ASCT. M12: twelve months from ASCT. MRD Pos: MRD positive. MRD Neg: MRD negative. MRD PNQ: MRD positive non quantifiable.

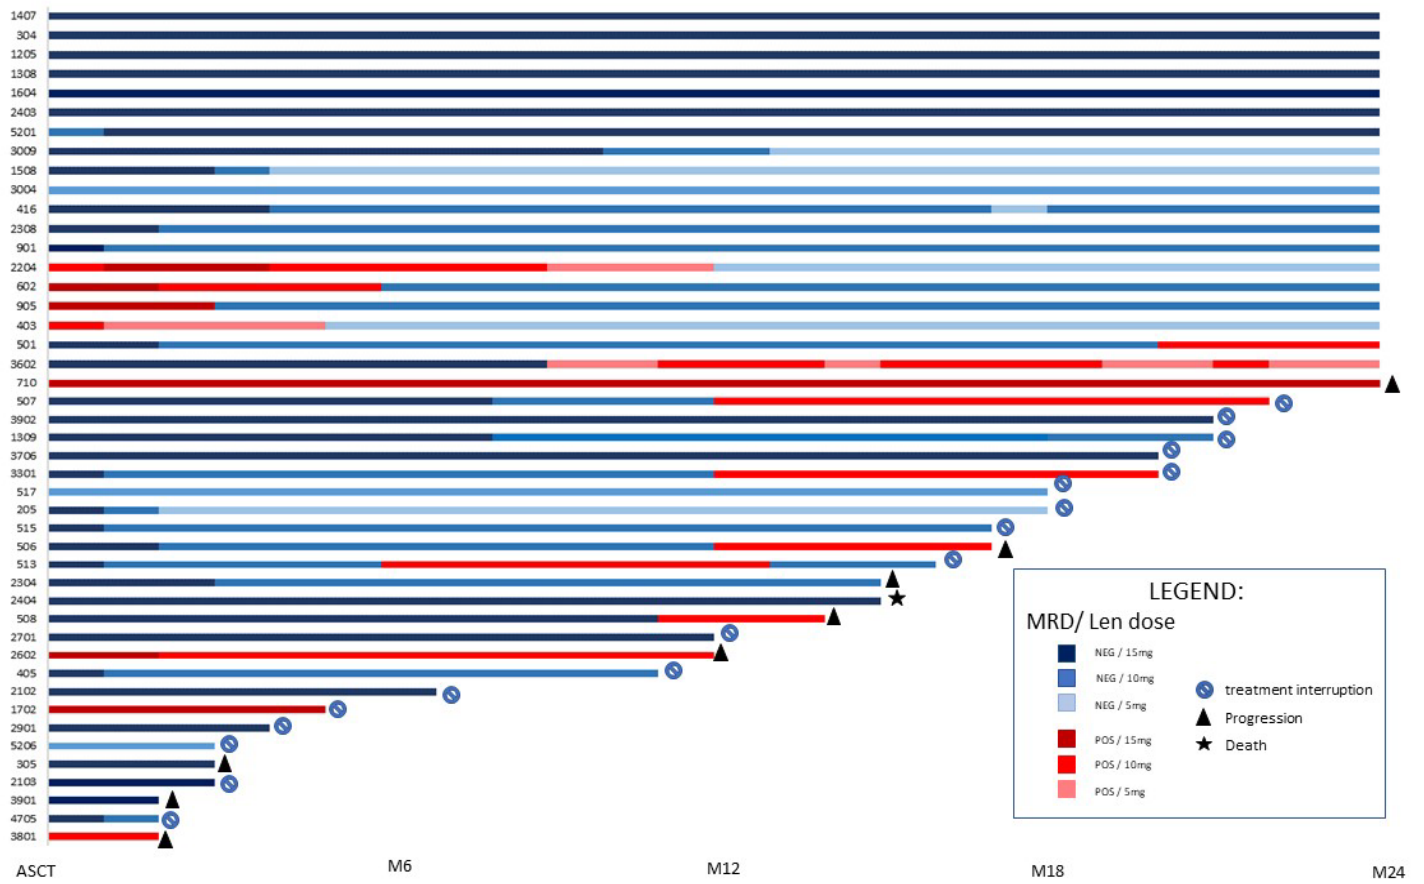

**Figure S7. MRD status and lenalidomide dose in the randomized population from ASCT to M24.**

Abbreviations. LEN: lenalidomide. ASCT: autologous stem cell transplant. M: months from ASCT. MRD Pos: MRD positive. MRD Neg: MRD negative.

## TABLES

| MRD Timepoint    | Expected samples | Compliance | On treatment | Compliance | Treatment interruption | Compliance |
|------------------|------------------|------------|--------------|------------|------------------------|------------|
| <b>BASELINE</b>  | <b>300</b>       |            |              |            |                        |            |
| <b>R-CTX</b>     | <b>236</b>       | <b>95%</b> | <b>234</b>   | <b>96%</b> | <b>2</b>               | <b>0%</b>  |
| <b>R-HD-ARAC</b> | <b>215</b>       | <b>85%</b> | <b>205</b>   | <b>87%</b> | <b>10</b>              | <b>50%</b> |
| <b>ASCT</b>      | <b>203</b>       | <b>89%</b> | <b>168</b>   | <b>93%</b> | <b>35</b>              | <b>69%</b> |
| <b>M6</b>        | <b>192</b>       | <b>70%</b> | <b>144</b>   | <b>83%</b> | <b>48</b>              | <b>31%</b> |
| <b>M12</b>       | <b>179</b>       | <b>70%</b> | <b>130</b>   | <b>86%</b> | <b>49</b>              | <b>27%</b> |
| <b>M18</b>       | <b>169</b>       | <b>57%</b> | <b>119</b>   | <b>67%</b> | <b>50</b>              | <b>34%</b> |
| <b>M24</b>       | <b>151</b>       | <b>63%</b> | <b>102</b>   | <b>79%</b> | <b>49</b>              | <b>29%</b> |
| <b>M30</b>       | <b>142</b>       | <b>50%</b> | <b>95</b>    | <b>59%</b> | <b>47</b>              | <b>32%</b> |
| <b>M36</b>       | <b>140</b>       | <b>51%</b> | <b>94</b>    | <b>63%</b> | <b>46</b>              | <b>26%</b> |

(A)

| MRD Timepoint    | Expected samples | Compliance | On treatment | Compliance | Treatment interruption | Compliance |
|------------------|------------------|------------|--------------|------------|------------------------|------------|
| <b>BASELINE</b>  | <b>300</b>       |            |              |            |                        |            |
| <b>R-CTX</b>     | <b>236</b>       | <b>93%</b> | <b>234</b>   | <b>94%</b> | <b>2</b>               | <b>0%</b>  |
| <b>R-HD-ARAC</b> | <b>215</b>       | <b>86%</b> | <b>205</b>   | <b>88%</b> | <b>10</b>              | <b>50%</b> |
| <b>ASCT</b>      | <b>203</b>       | <b>88%</b> | <b>168</b>   | <b>93%</b> | <b>35</b>              | <b>66%</b> |
| <b>M6</b>        | <b>192</b>       | <b>67%</b> | <b>144</b>   | <b>80%</b> | <b>48</b>              | <b>29%</b> |
| <b>M12</b>       | <b>179</b>       | <b>70%</b> | <b>130</b>   | <b>86%</b> | <b>49</b>              | <b>27%</b> |
| <b>M18</b>       | <b>169</b>       | <b>54%</b> | <b>119</b>   | <b>62%</b> | <b>50</b>              | <b>34%</b> |
| <b>M24</b>       | <b>151</b>       | <b>64%</b> | <b>102</b>   | <b>81%</b> | <b>49</b>              | <b>29%</b> |
| <b>M30</b>       | <b>142</b>       | <b>51%</b> | <b>95</b>    | <b>58%</b> | <b>47</b>              | <b>32%</b> |
| <b>M36</b>       | <b>140</b>       | <b>51%</b> | <b>94</b>    | <b>66%</b> | <b>46</b>              | <b>26%</b> |

(B)

**Table S1. Sample collection compliance.** BM (A) and PB (B) samples.

Abbreviations: R-CTX: Rituximab-Cyclophosphamide. R-HD-ARA-C: Rituximab-High dose Cytarabine. ASCT: Autologous Stem Cell Transplant. MRD: minimal residual disease.



| Baseline features                                | No marker (50) | <i>BCL1</i> only (39) | <i>IGH</i> only (153) | <i>IGH+BCL1</i> (58) | Sign.     |
|--------------------------------------------------|----------------|-----------------------|-----------------------|----------------------|-----------|
| Female, no. (%)                                  | 11 (22%)       | 5 (12%)               | 35 (23%)              | 14 (24%)             | P= 0.5    |
| Ann Arbor stage Stage IV, no. (%)                | 40 (80%)       | 35 (89%)              | 149 (97%)             | 58 (100%)            | P< 0.001* |
| Bulky disease (>5 cm), no. (%)                   | 11 (22%)       | 14 (36%)              | 45 (29%)              | 28 (48%)             | P= 0.019* |
| PS ECOG > 0, no. (%)                             | 7 (14%)        | 6 (15%)               | 33 (21%)              | 23 (39%)             | P= 0.005* |
| Ki67>30%, no. (%)                                | 15 (32%)       | 10 (27%)              | 41 (30%)              | 18 (35%)             | P= 0.83   |
| Blastoid histology, no. (%)                      | 4 (8%)         | 3 (7%)                | 15 (9%)               | 4 (7%)               | P= 0.95   |
| High risk MIPI, no. (%)                          | 3 (6%)         | 1 (3%)                | 28 (18%)              | 14 (24%)             | P= 0.003* |
| Tumor infiltration by CF > median value, no. (%) | 7 (16%)        | 8 (23%)               | 73 (59%)              | 38 (74%)             | P< 0.001* |

**Table S2. Clinical characteristics and molecular markers at the time of enrollment.**

Abbreviations: PS ECOG: Performance status by Eastern Cooperative Oncology Group. MIPI: Mantle cell Prognostic Index. CF: Flow Cytometry.

|                                  | BM   |           |       | PB   |           |       |
|----------------------------------|------|-----------|-------|------|-----------|-------|
|                                  | HR   | 95%CI     | p     | HR   | 95%CI     | p     |
| <b>Positive (ref)</b>            | 1    | -         | -     | 1    | -         | -     |
| <b>1 cumulative negativity</b>   | 0.42 | 0.21,0.85 | 0.015 | 0.82 | 0.44,1.54 | 0.541 |
| <b>2 cumulative negativities</b> | 0.39 | 0.19,0.79 | 0.009 | 0.58 | 0.31,1.08 | 0.087 |
| <b>3 or more negativities</b>    | 0.16 | 0.08,0.32 | 0.000 | 0.23 | 0.12,0.42 | 0.000 |

**Table S3. TTP analysis according to cumulative negativity results of RQ-PCR in BM and PB.** PCR evaluations were included as time-dependent covariate in a Cox model.

Abbreviations: TTP, time to progression; HR, hazard ratio; CI, confidence interval; ref, reference; RQ-PCR, Real Time quantitative polymerase chain reaction; BM, bone marrow; PB, peripheral blood.
